# Supplementary material for: Developmental and Nutritional Changes in Children with Severe Acute Malnutrition Provided with n-3 Fatty Acids Improved Ready-to-Use Therapeutic Food and Psychosocial Support: A Pilot Study in Tanzania
Source: MDPI journal article supplement (doi:10.3390/nu16050692), 2024-02-28
Supplement: s1 [file s1]

**Figure S1. Flowchart of phases and processes of work undertaken in the BrightSAM feasibility and pilot study.**

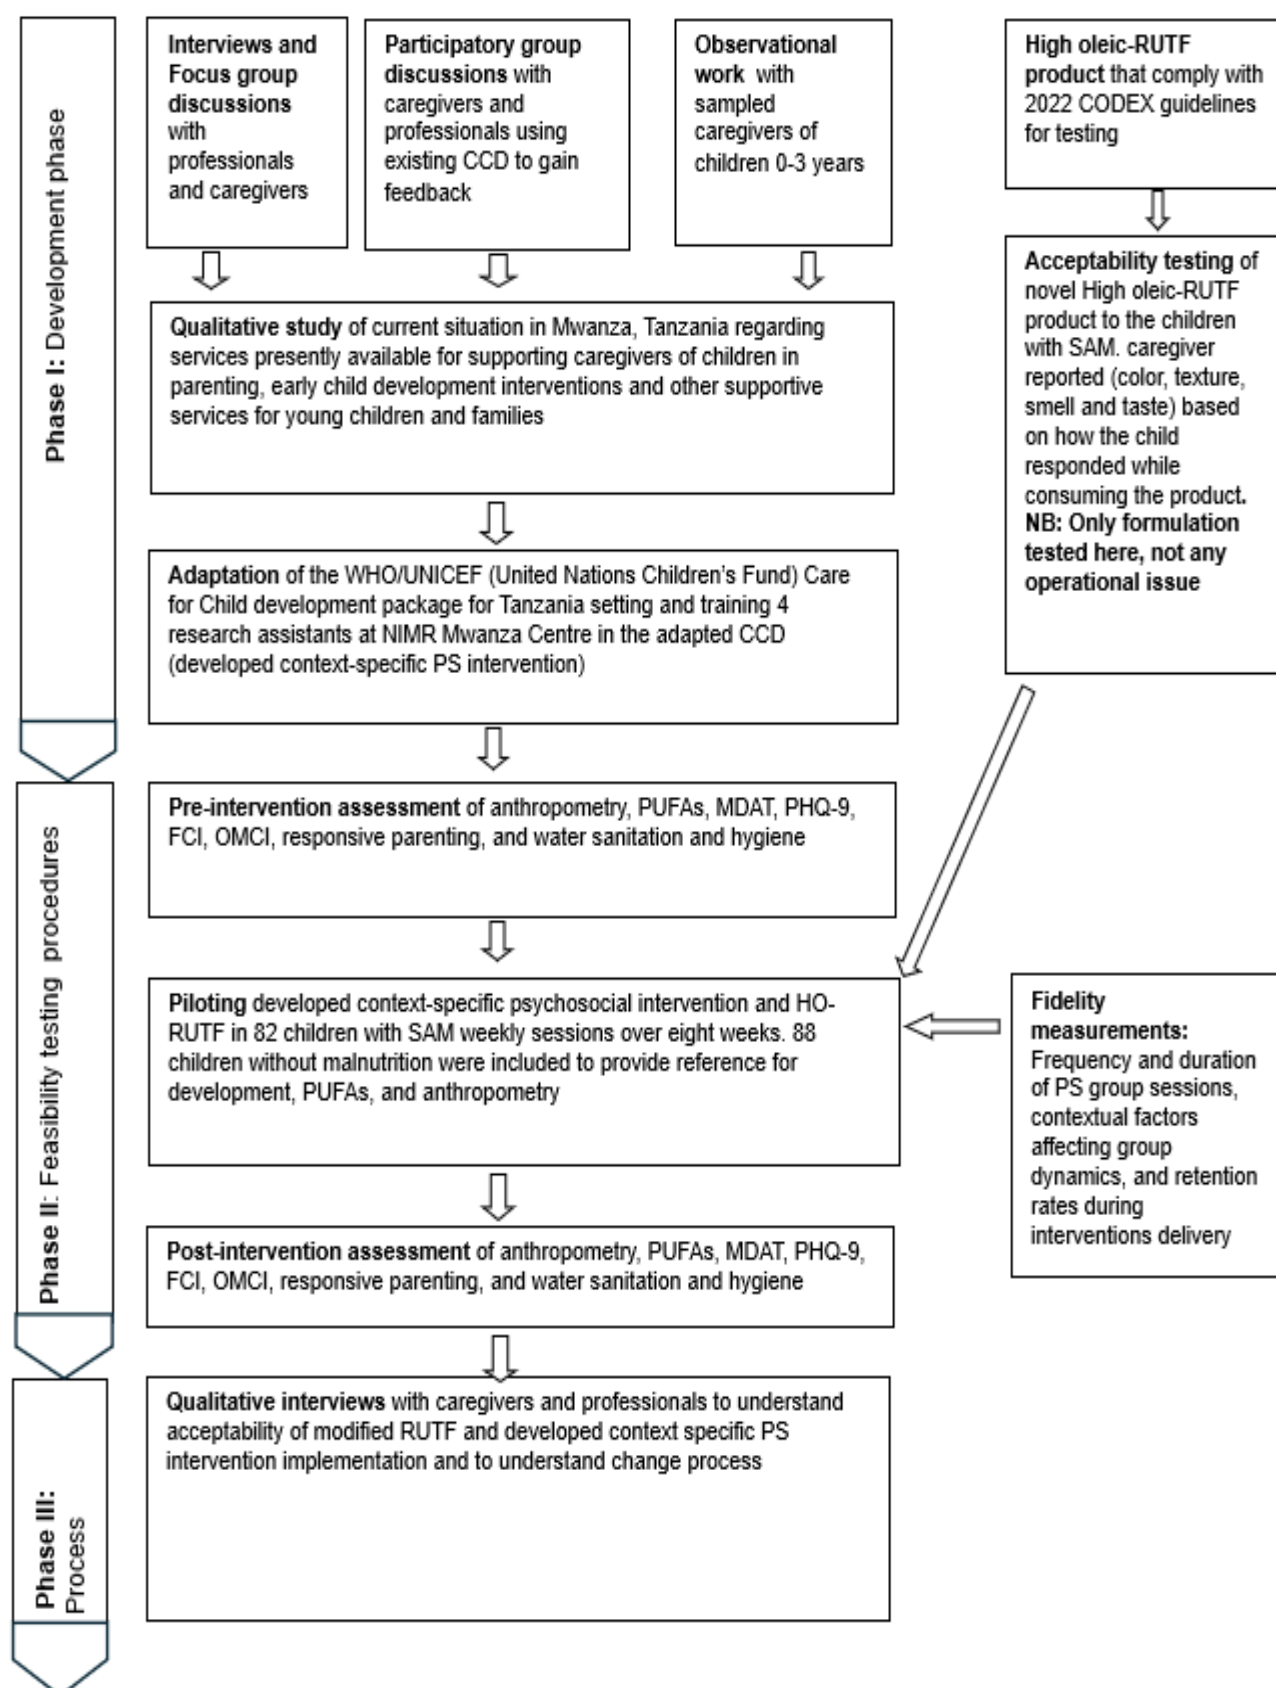

**Table S1:** Nutritional composition of ready-to-use therapeutic food

|                              | <b>For 100g of RUTF EFA+</b> |
|------------------------------|------------------------------|
|                              | <b>Mean value</b>            |
| <b>Macronutrient</b>         |                              |
| Energy, kcal                 | 543                          |
| Protein, g                   | 14.1                         |
| Protein, dairy, g            | 0.84                         |
| Lipids, g                    | 33.8                         |
| Linolenic acid, g            | 3.7                          |
| alpha linoleic acid, g       | 1.02                         |
| Carbohydrates, mg            | 44.5                         |
| Total fibres                 | 1.6                          |
| Moisture, g                  | 0                            |
| DHA, mg                      | 0                            |
| EPA, mg                      | 0                            |
| <b>Micronutrient</b>         |                              |
| Phosphorus, mg               | 384                          |
| of which free phosphorus, mg | 340                          |
| Calcium, mg                  | 358                          |
| Potassium, mg                | 1374                         |
| Magnesium, mg                | 88                           |
| Zinc, mg                     | 12.8                         |
| Copper, mg                   | 1.7                          |
| Iron, mg                     | 11.4                         |
| Iodine, µg                   | 123                          |
| Selenium, µg                 | 38                           |
| Sodium, mg                   | 166                          |
| Vitamin A, mg RE             | 0.86                         |
| Vitamin D, µg                | 15                           |
| Vitamin E, mg alpha-TE       | 20                           |
| Vitamin C, mg                | 50                           |
| Vitamin B1, mg               | 0.54                         |
| Vitamin B2, mg               | 1.6                          |
| Vitamin B6, mg               | 0.6                          |
| Vitamin B12, µg              | 1.6                          |
| Vitamin K, µg                | 28                           |
| Biotin, µg                   | 64                           |
| Folic acid, µg               | 200                          |
| Pantothenic acid, mg         | 3                            |
| Niacin, mg                   | 5                            |

**Table S2:** Family care indicators, caregiver-child interaction, and maternal depression in children with and without severe acute malnutrition

|                                                 | Baseline              |                           | <sup>1</sup> P | Frequencies at 8 weeks<br>SAM, n=70<br>N (%) |
|-------------------------------------------------|-----------------------|---------------------------|----------------|----------------------------------------------|
|                                                 | SAM,<br>n=70<br>N (%) | Non-SAM,<br>n=78<br>N (%) |                |                                              |
| <b>Household books</b>                          |                       |                           | 0.24           |                                              |
| None                                            | 62 (89)               | 61 (78)                   |                | 50 (71)                                      |
| 1-2                                             | 7 (10)                | 15 (19)                   |                | 18 (26)                                      |
| 3-4                                             | 1 (1)                 | 2 (3)                     |                | 2 (3)                                        |
| <b>Sources of play materials</b>                |                       |                           |                |                                              |
| Home-made toys                                  | 0 (0)                 | 3 (4)                     | 0.10           | 51 (73)                                      |
| Purchased toys                                  | 25 (36)               | 39 (50)                   | 0.08           | 28 (40)                                      |
| Household objects                               | 67 (96)               | 78 (100)                  | 0.07           | 67 (96)                                      |
| <b>Variety of play materials</b>                |                       |                           |                |                                              |
| Things that make/play music                     | 8 (11)                | 14 (18)                   | 0.27           | 18 (26)                                      |
| Things for drawing/writing                      | 14 (20)               | 27 (35)                   | 0.05           | 23 (33)                                      |
| Children's picture books                        | 1 (1)                 | 8 (10)                    | 0.03           | 10 (14)                                      |
| Things for stacking/construction/building       | 7 (10)                | 15 (19)                   | 0.12           | 8 (11)                                       |
| Things for moving around (eg. toy bicycle)      | 1 (1)                 | 3 (4)                     | 0.35           | 2 (3)                                        |
| Toys for learning shapes/colours                | 0 (0)                 | 2 (3)                     | 0.18           | 2 (3)                                        |
| Things for pretending (eg. cooking or shopping) | 5 (7)                 | 18 (23)                   | 0.008          | 9 (13)                                       |
| <b>Family interaction</b>                       |                       |                           |                |                                              |
| Read books or looked at picture books           | 3 (4)                 | 12 (15)                   | 0.03           | 18 (26)                                      |
| Tell stories                                    | 6 (9)                 | 7 (9)                     | 0.93           | 12 (17)                                      |
| Sing songs                                      | 58 (83)               | 70 (90)                   | 0.22           | 70 (100)                                     |
| Take the child outside the home                 | 42 (60)               | 63 (81)                   | 0.005          | 68 (97)                                      |
| Played with the child                           | 63 (90)               | 77 (99)                   | 0.02           | 70 (100)                                     |
| Spend time naming things/counting/drawing       | 16 (23)               | 33 (42)                   | 0.02           | 32 (46)                                      |
| <b>Maternal depression scale (PHQ9)</b>         |                       |                           | <0.001         |                                              |
| Non/minimal                                     | 22 (31.4)             | 56 (71.8)                 |                | 63 (90.0)                                    |
| Mild                                            | 15 (21.4)             | 9 (11.5)                  |                | 3 (4.3)                                      |
| Moderate                                        | 17 (24.3)             | 4 (5.1)                   |                | 2 (2.9)                                      |
| Moderately severe                               | 9 (12.9)              | 4 (5.1)                   |                | 1 (1.4)                                      |
| Severe                                          | 7 (10.0)              | 5 (6.4)                   |                | 1 (1.4)                                      |

<sup>1</sup>p= p-value (chi-squared test) for difference between children with and without SAM at baseline. PHQ9= Patient Health Questionnaire-9. SAM= severe acute malnutrition
